# Supplementary material for: Removal of benzylidene acetal and benzyl ether in carbohydrate derivatives using triethylsilane and Pd/C
Source: PubMed Central journal article supplement (PMC3566760; doi:10.3762/bjoc.9.9), 2013-01-14
Supplement: Beilstein_J_Org_Chem-09-74-s001.pdf [file Beilstein_J_Org_Chem-09-74-s001.pdf]

# Supporting Information

for

## Removal of benzylidene acetal and benzyl ether in carbohydrate derivatives using triethylsilane and Pd/C

Abhishek Santra, Tamashree Ghosh and Anup Kumar Misra\*

Address: Bose Institute, Division of Molecular Medicine, P-1/12, C.I.T. Scheme VII-M, Kolkata-700054, India; FAX: 91-33-2355 3886

Email: Anup Kumar Misra - [akmisra69@gmail.com](mailto:akmisra69@gmail.com)

\*Corresponding author

### Analytical data of new compounds, <sup>1</sup>H NMR and <sup>13</sup>C NMR spectra

|                                                                                                                                                                         |    |
|-------------------------------------------------------------------------------------------------------------------------------------------------------------------------|----|
| Analytical data of new compounds: acetylated- <b>8, 14, 16</b> , acetylated- <b>18, 22</b><br>and acetylated- <b>24</b> .....                                           | S2 |
| NMR spectra of compounds <b>2, 4</b> , acetylated- <b>6</b> , acetylated- <b>8, 10, 12, 14, 16</b> ,<br>acetylated- <b>18, 22</b> , acetylated- <b>24, 27, 29</b> ..... | S5 |

### Analytical data of new compounds

#### **2-(*p*-Methoxyphenoxy)ethyl 2,3,4,6-tetra-*O*-acetyl- $\alpha$ -D-mannopyranoside (acetylated-8):**

Colorless oil;  $[\alpha]_D^{25} + 39$  (*c* 1.0, CHCl<sub>3</sub>); IR (neat): 2566, 1759, 1377, 1229, 1166, 1053, 916 cm<sup>-1</sup>; <sup>1</sup>H NMR (CDCl<sub>3</sub>, 500 MHz):  $\delta$  6.78-6.73 (m, 4 H, Ar-H), 5.24 (dd, *J* = 10.0 Hz, 3.0 Hz, 1 H, H-3), 5.20-5.19 (m, 1 H, H-2), 5.18 (t, *J* = 10.0 Hz each, 1 H, H-4), 4.83 (d, *J* = 1.5 Hz, 1 H, H-1), 4.19 (dd, *J* = 12.0 Hz, 5.0 Hz, 1 H, H-6<sub>a</sub>), 4.08-4.04 (m, 2 H, H-5, H-6<sub>b</sub>), 4.01-3.96 (m, 2 H, CH<sub>2</sub>), 3.94-3.90 (m, 1 H, CH<sub>2</sub>), 3.83-3.78 (m, 1 H, CH<sub>2</sub>), 3.69 (s, 3 H, OCH<sub>3</sub>), 2.09, 2.01, 1.96, 1.92 (4s, 12 H, 4 COCH<sub>3</sub>); <sup>13</sup>C NMR (CDCl<sub>3</sub>, 125 MHz):  $\delta$  170.4, 169.8, 169.6, 169.5 (4 COCH<sub>3</sub>), 154.2-114.7 (Ar-C), 97.7 (C-1), 69.5 (C-2), 69.0 (C-3), 68.6 (OCH<sub>2</sub>), 67.4 (OCH<sub>2</sub>), 66.9 (C-4), 66.1 (C-5), 62.3 (C-6), 55.6 (OCH<sub>3</sub>), 20.9, 20.7, 20.6 (2 C) (4 COCH<sub>3</sub>); ESIMS: 521.1 [M + Na]<sup>+</sup>; Anal. calcd for C<sub>23</sub>H<sub>30</sub>O<sub>12</sub> (498.17): C, 55.42; H, 6.07; found: C, 55.25; H, 6.26.

#### ***p*-Methoxyphenyl 2,3-di-*O*-acetyl- $\beta$ -D-galactopyranoside (14):**

Colorless oil;  $[\alpha]_D^{25} + 14$  (*c* 1.0, CHCl<sub>3</sub>); IR (neat): 2988, 2942, 1748, 1433, 1377, 1226, 1085, 1056, 918, 756 cm<sup>-1</sup>; <sup>1</sup>H NMR (CDCl<sub>3</sub>, 500 MHz):  $\delta$  6.84 (d, *J* = 9.0 Hz, 2 H, Ar-H), 6.70 (d, *J* = 9.0 Hz, 2 H, Ar-H), 5.40 (dd, *J* = 8.0 Hz each, 1 H, H-2), 4.90 (dd, *J* = 10.5, 3.5 Hz, 1 H, H-3), 4.85 (d, *J* = 8.0 Hz, 1 H, H-1), 4.11 (br s, 1 H, H-4), 3.84-3.80 (m, 2 H, H-6<sub>ab</sub>), 3.67 (s, 3 H, OCH<sub>3</sub>), 3.62-3.60 (m, 1 H, H-5), 3.44, 2.92 (2 br s, 1 H each, 2 OH), 2.03, 1.99 (2s, 6 H, 2 COCH<sub>3</sub>); <sup>13</sup>C NMR (CDCl<sub>3</sub>, 125 MHz):  $\delta$  170.3, 169.6 (2 COCH<sub>3</sub>), 155.5-114.6 (Ar-C), 100.7 (C-1), 74.4 (C-5), 73.4 (C-3), 69.3 (C-4), 67.8 (C-2), 62.0 (C-6), 55.5 (OCH<sub>3</sub>), 20.8, 20.7 (2 COCH<sub>3</sub>); ESIMS: 393.1 [M + Na]<sup>+</sup>; Anal. calcd for C<sub>17</sub>H<sub>22</sub>O<sub>9</sub> (370.12): C, 55.13; H, 5.99; found: C, 54.97; H, 6.25.

#### ***n*-Propyl 2,3-di-*O*-acetyl- $\beta$ -D-galactopyranoside (16):**

Colorless oil;  $[\alpha]_D^{25} + 2$  1.0, CHCl<sub>3</sub>); IR (neat): 2928, 2853, 1744, 1371, 1222, 1045, 914, 761 cm<sup>-1</sup>; <sup>1</sup>H NMR (CDCl<sub>3</sub>, 500 MHz):  $\delta$  5.17 (dd, *J* = 8.0 Hz each, 1 H, H-2), 4.83 (dd, *J* = 10.5, 3.5 Hz, 1 H, H-3), 4.39 (d, *J* = 7.5 Hz, 1 H, H-1), 4.08 (d, *J* = 3.0 Hz, 1 H, H-4), 3.85-3.76 (m, 3 H, H-6<sub>ab</sub>, CH<sub>2</sub>), 3.53-3.51 (m, 1 H, H-5), 3.38-3.34 (m, 1 H, CH<sub>2</sub>), 2.02, 1.97 (2 s, 6 H, 2 COCH<sub>3</sub>), 1.55-1.45 (m, 2 H, CH<sub>2</sub>), 0.85 (t, *J* = 7.5 Hz each, 3 H, CH<sub>3</sub>); <sup>13</sup>C NMR (CDCl<sub>3</sub>, 125 MHz):  $\delta$  170.3, 169.6 (2 COCH<sub>3</sub>), 101.3 (C-1), 74.0 (C-5), 73.5 (OCH<sub>2</sub>), 71.6 (C-3), 69.5 (C-2), 68.0 (C-4), 62.0 (C-6), 22.7 (CH<sub>2</sub>), 20.8, 20.7 (2 COCH<sub>3</sub>), 10.3 (CH<sub>3</sub>); ESIMS: 329.1 [M + Na]<sup>+</sup>; Anal. calcd for C<sub>13</sub>H<sub>22</sub>O<sub>8</sub> (306.13): C, 50.97; H, 7.24; found: C, 50.79; H, 7.46.

**6-Bromohexyl 2-acetamido-3,4,6-tri-O-acetyl-2-deoxy- $\alpha$ -D-galactopyranoside (acetylated-18):** Colorless oil;  $[\alpha]_D^{25} + 55$  (*c* 1.0, CHCl<sub>3</sub>); IR (neat): 2994, 2947, 1756, 1444, 1356, 1233, 1087, 1056, 915, 756 cm<sup>-1</sup>; <sup>1</sup>H NMR (CDCl<sub>3</sub>, 500 MHz):  $\delta$  5.59 (d, *J* = 9.5 Hz, 1 H, NH), 5.35 (d, *J* = 3.0 Hz, 1 H, H-1), 5.15 (dd, *J* = 11.0, 3.0 Hz, 1 H, H-3), 4.85 (d, *J* = 4.0 Hz, 1 H, H-4), 4.56- 4.51 (m, 1 H, H-5), 4.13- 4.05 (m, 3 H, H-2, H-6<sub>ab</sub>), 3.71-3.66 (m, 1 H, OCH<sub>2</sub>), 3.47-3.42 (m, 1 H, OCH<sub>2</sub>), 3.32-3.26 (m, 2 H, CH<sub>2</sub>), 2.17, 2.04, 2.00, 1.96 (4 s, 12 H, 4 COCH<sub>3</sub>), 1.64-1.61 (m, 4 H, CH<sub>2</sub>); <sup>13</sup>C NMR (CDCl<sub>3</sub>, 125 MHz):  $\delta$  170.8, 170.2 (2 C), 169.7 (4 COCH<sub>3</sub>), 97.6 (C-1), 68.4 (C-3), 68.2 (OCH<sub>2</sub>), 67.3 (C-5), 66.6 (C-4), 61.8 (C-6), 51.2 (C-2), 47.9 (CH<sub>2</sub>), 29.2 (CH<sub>2</sub>), 28.8 (CH<sub>2</sub>), 26.5 (CH<sub>2</sub>), 25.8 (CH<sub>2</sub>), 23.2 (NHCOCH<sub>3</sub>), 20.7 (2 C), 20.6 (3 COCH<sub>3</sub>); ESIMS: 532.1 [M + Na]<sup>+</sup>; Anal. calcd for C<sub>20</sub>H<sub>32</sub>BrNO<sub>9</sub> (509.12): C, 47.07; H, 6.32; found: C, 46.90; H, 6.46.

***p*-Methoxyphenyl O-(2,3-di-O-acetyl- $\alpha$ -D-glucopyranosyl)-(1 $\rightarrow$ 4)-2,3,6-tri-O-acetyl- $\beta$ -D-glucopyranoside (22):** Colorless oil;  $[\alpha]_D^{25} + 43$  (*c* 1.0, CHCl<sub>3</sub>); IR (neat): 2928, 2856, 1746, 1433, 1372, 1229, 1041, 759, 602 cm<sup>-1</sup>; <sup>1</sup>H NMR (CDCl<sub>3</sub>, 500 MHz):  $\delta$  6.90 (d, *J* = 9.0 Hz, 2 H, Ar-H), 6.76 (d, *J* = 9.0 Hz, 2 H, Ar-H), 5.33 (d, *J* = 3.5 Hz, 1 H, H-1<sub>B</sub>), 5.27 (t, *J* = 9.0 Hz each, 1 H, H-2<sub>A</sub>), 5.19 (t, *J* = 9.0 Hz each, 1 H, H-3<sub>A</sub>), 5.03 (t, *J* = 8.0 Hz each, 1 H, H-3<sub>B</sub>), 4.97 (t, *J* = 8.0 Hz, 1 H, H-1<sub>A</sub>), 4.71 (dd, *J* = 10.5, 3.0 Hz, 1 H, H-2<sub>B</sub>), 4.50 (d, *J* = 12.0 Hz, 1 H, H-6<sub>aA</sub>), 4.21 (dd, *J* = 12.0, 5.0 Hz, 1 H, H-6<sub>bA</sub>), 4.05 (t, *J* = 9.5 Hz each, 1 H, H-4<sub>B</sub>), 3.82-3.76 (m, 3 H, H-4<sub>A</sub>, H-5<sub>A</sub>, H-5<sub>B</sub>), 3.74 (s, 3 H, OCH<sub>3</sub>), 3.63-3.59 (m, 2 H, H-6<sub>abB</sub>), 2.09, 2.06, 2.02, 2.00 (5 s, 15 H, 5 COCH<sub>3</sub>); <sup>13</sup>C NMR (CDCl<sub>3</sub>, 125 MHz):  $\delta$  171.1, 171.8, 170.7, 170.2, 169.5 (5 COCH<sub>3</sub>), 155.7-114.5 (Ar-C), 99.5 (C-1<sub>B</sub>), 95.7 (C-1<sub>A</sub>), 75.4 (C-3<sub>B</sub>), 72.8 (C-3<sub>A</sub>), 72.3 (C-4<sub>A</sub>), 72.2 (C-4<sub>B</sub>), 72.0 (C-2<sub>B</sub>), 71.8 (C-2<sub>A</sub>), 70.4 (C-5<sub>B</sub>), 69.2 (C-5<sub>A</sub>), 62.9 (C-6<sub>B</sub>), 61.8 (C-6<sub>A</sub>), 55.5 (OCH<sub>3</sub>), 20.9, 20.8 (2 C), 20.6, 20.5 (5 COCH<sub>3</sub>); ESIMS: 681.2 [M + Na]<sup>+</sup>; Anal. calcd for C<sub>29</sub>H<sub>38</sub>O<sub>17</sub> (658.21): C, 52.89; H, 5.82; found: C, 52.74; H, 6.00.

***p*-Methoxyphenyl O-(2,3,4-tri-O-acetyl- $\alpha$ -L-rhamnopyranosyl)-(1 $\rightarrow$ 3)-2-acetamido-4,6-di-O-acetyl-2-deoxy- $\alpha$ -D-glucopyranoside (acetylated-24):** Colorless oil;  $[\alpha]_D^{25} + 63$  (*c* 1.0, CHCl<sub>3</sub>); IR (neat): 2957, 2924, 2592, 1745, 1433, 1376, 1239, 1044, 890 cm<sup>-1</sup>; <sup>1</sup>H NMR (CDCl<sub>3</sub>, 500 MHz):  $\delta$  6.98 (d, *J* = 9.0 Hz, 2 H, Ar-H), 6.83 (d, *J* = 9.0 Hz, 2 H, Ar-H), 5.86 (dd, *J* = 9.5, 3.5 Hz, 1 H, NH), 5.41 (d, *J* = 3.5 Hz, 1 H, H-1<sub>A</sub>), 5.17-5.11 (m, 3 H, H-2<sub>B</sub>, H-3<sub>B</sub>, H-4<sub>B</sub>), 5.04 (t, *J* = 10.0 Hz each, 1 H, H-4<sub>A</sub>), 4.86 (br s, 1 H, H-1<sub>B</sub>), 4.57 (t, *J* = 10.5 Hz each, 1 H, H-2<sub>A</sub>), 4.15-4.09 (m, 2 H, H-6<sub>abA</sub>), 4.03-3.90 (m, 3 H, H-3<sub>A</sub>, H-5<sub>A</sub>, H-5<sub>B</sub>), 3.77 (s, 3 H, OCH<sub>3</sub>), 2.16, 2.11, 2.08, 2.04, 2.03, 1.97 (6 COCH<sub>3</sub>), 1.14 (d, *J* = 6.0 Hz, 3 H, CCH<sub>3</sub>); <sup>13</sup>C NMR (CDCl<sub>3</sub>,

125 MHz):  $\delta$  170.5 (4 C), 169.5 (2 C) (6 COCH<sub>3</sub>), 155.5-114.8 (Ar-C), 99.8 (C-1<sub>A</sub>), 97.0 (C-1<sub>B</sub>), 80.3 (C-3<sub>A</sub>), 70.5 (C-5<sub>A</sub>), 70.1 (C-2<sub>B</sub>), 69.9 (C-3<sub>B</sub>), 68.9 (C-4<sub>A</sub>), 68.6 (C-4<sub>B</sub>), 67.6 (C-5<sub>B</sub>), 61.8 (C-6<sub>A</sub>), 55.6 (OCH<sub>3</sub>), 51.9 (C-2<sub>A</sub>), 23.2 (NHCOCH<sub>3</sub>), 21.1, 21.0, 20.8, 20.7, 20.6 (5 COCH<sub>3</sub>), 17.2 (CCH<sub>3</sub>); ESIMS: 706.2 [M + Na]<sup>+</sup>; Anal. calcd for C<sub>31</sub>H<sub>41</sub>NO<sub>16</sub> (683.24): C, 54.46; H, 6.04; found: C, 54.30; H, 6.22.

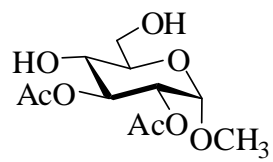

2

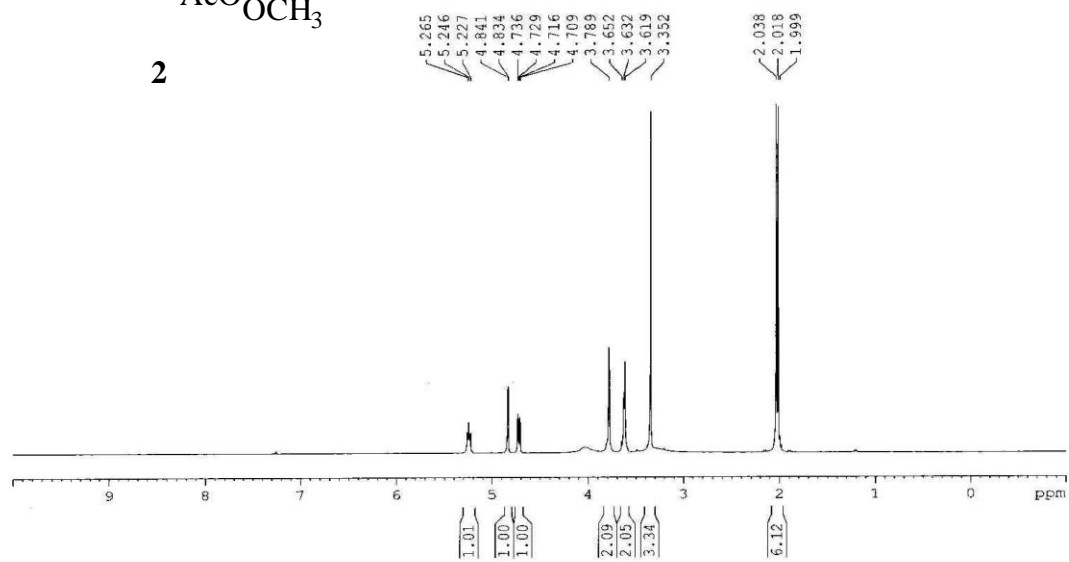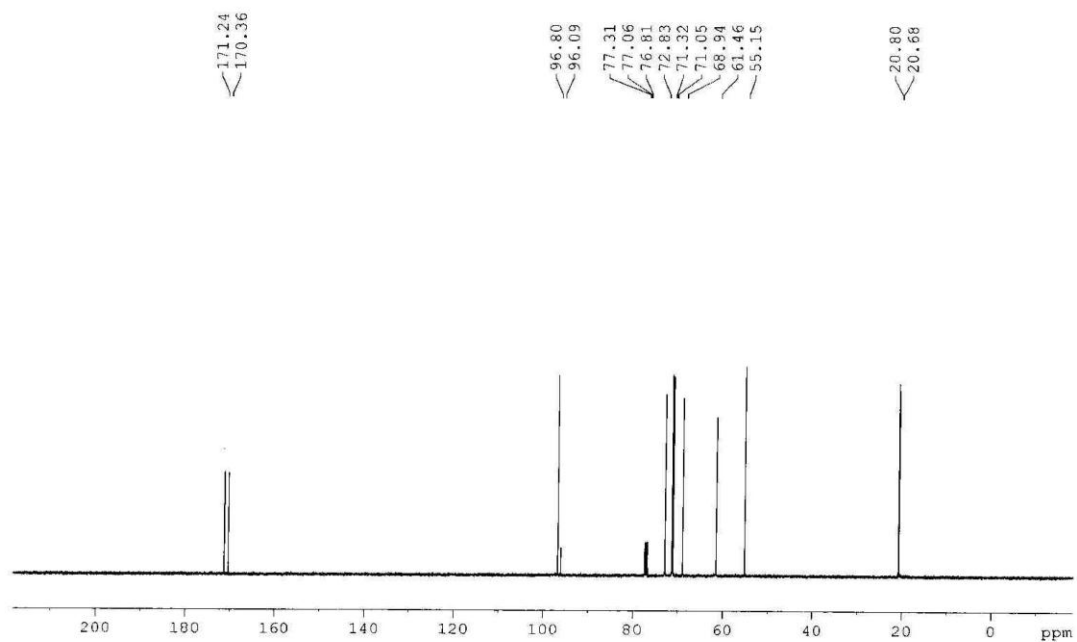

$^1\text{H}$  NMR (500 MHz) and  $^{13}\text{C}$  NMR (125 MHz) spectra in  $\text{CDCl}_3$ .

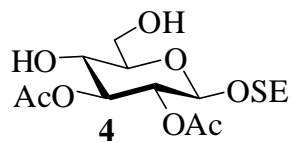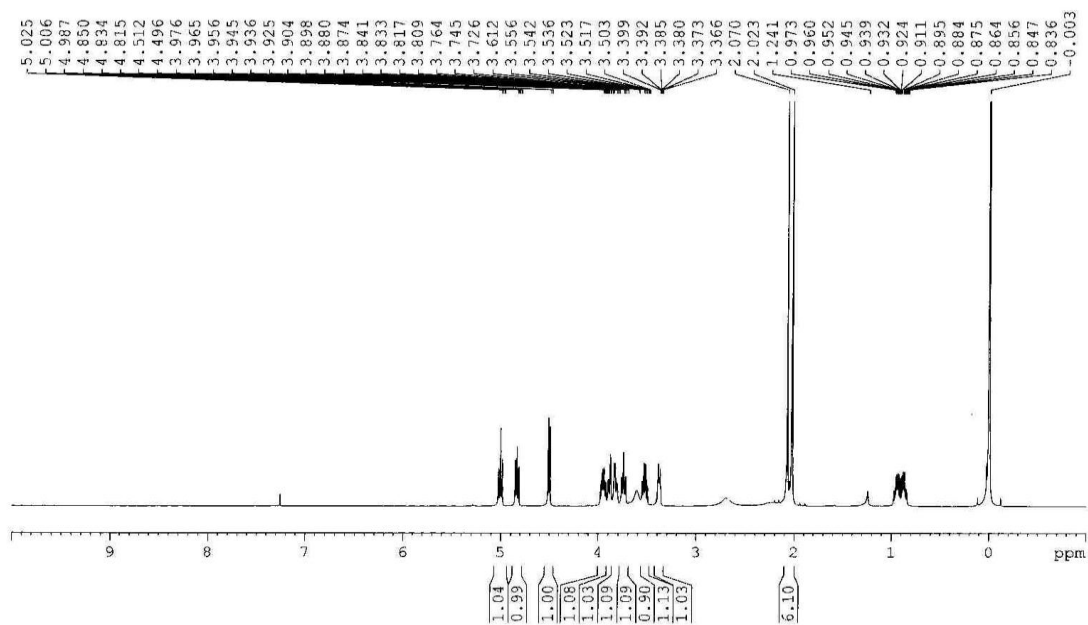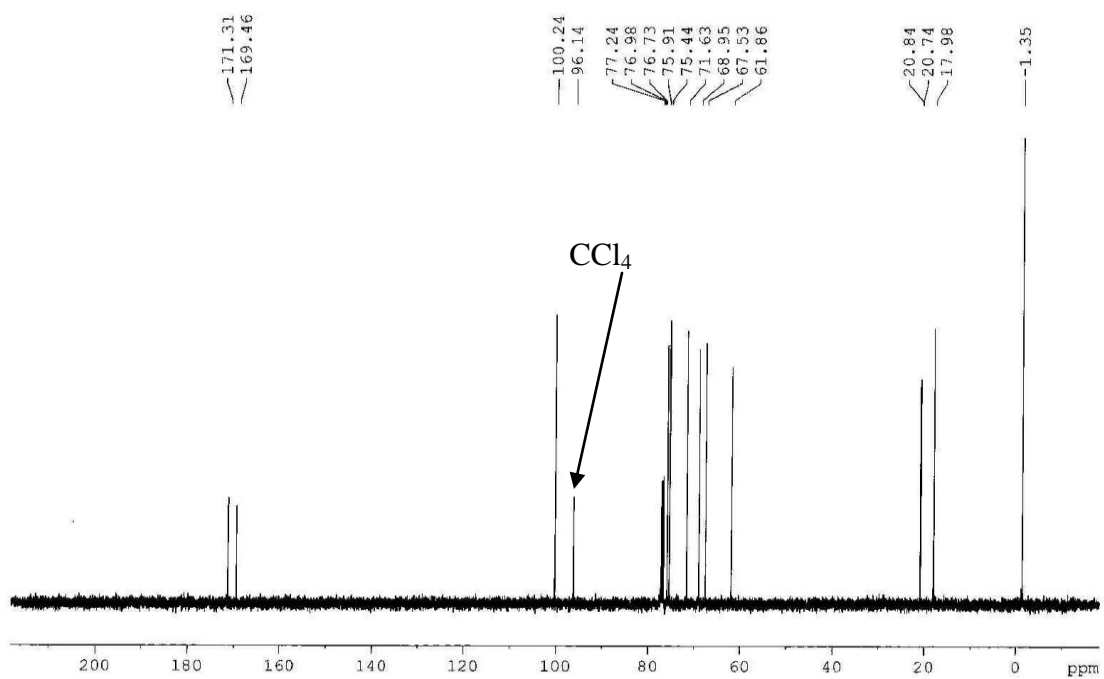

<sup>1</sup>H NMR (500 MHz) and <sup>13</sup>C NMR (125 MHz) spectra in CDCl<sub>3</sub>.

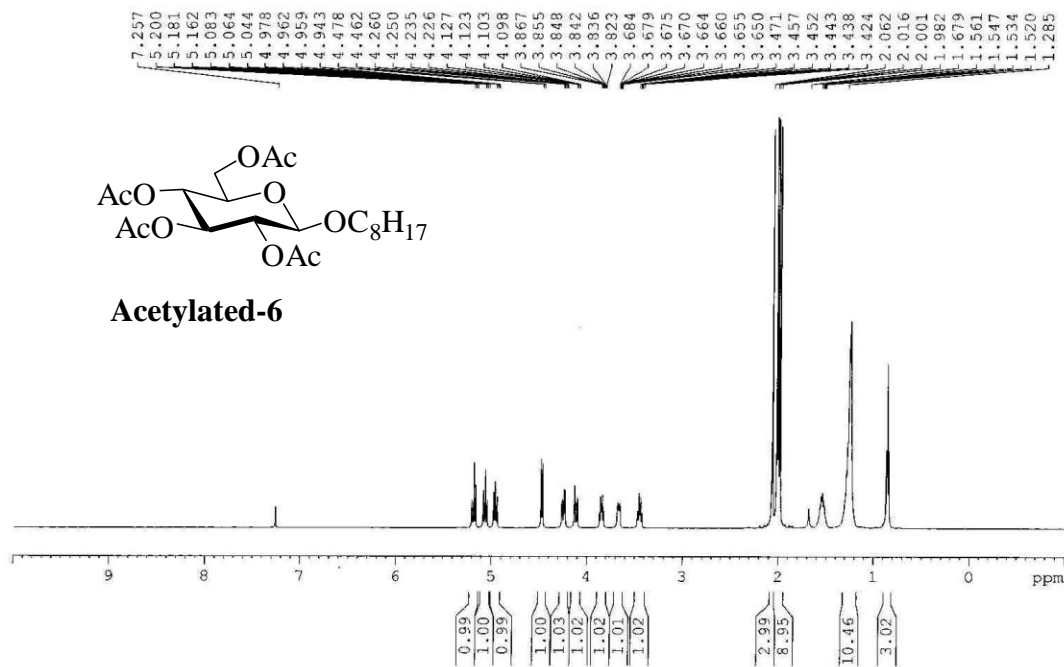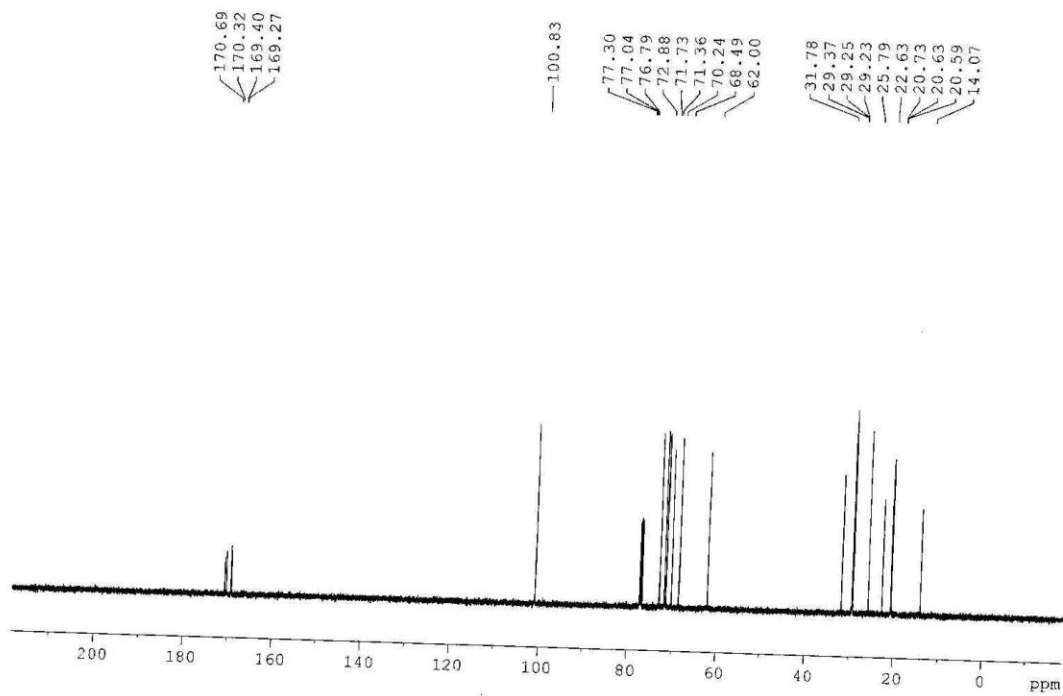

<sup>1</sup>H NMR (500 MHz) and <sup>13</sup>C NMR (125 MHz) spectra in CDCl<sub>3</sub>.

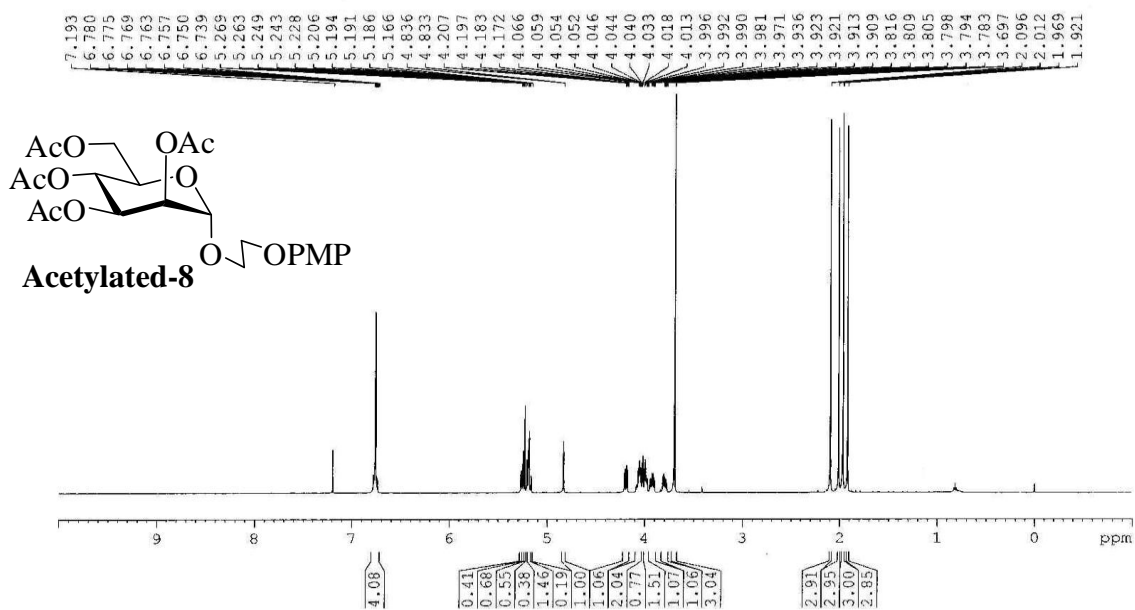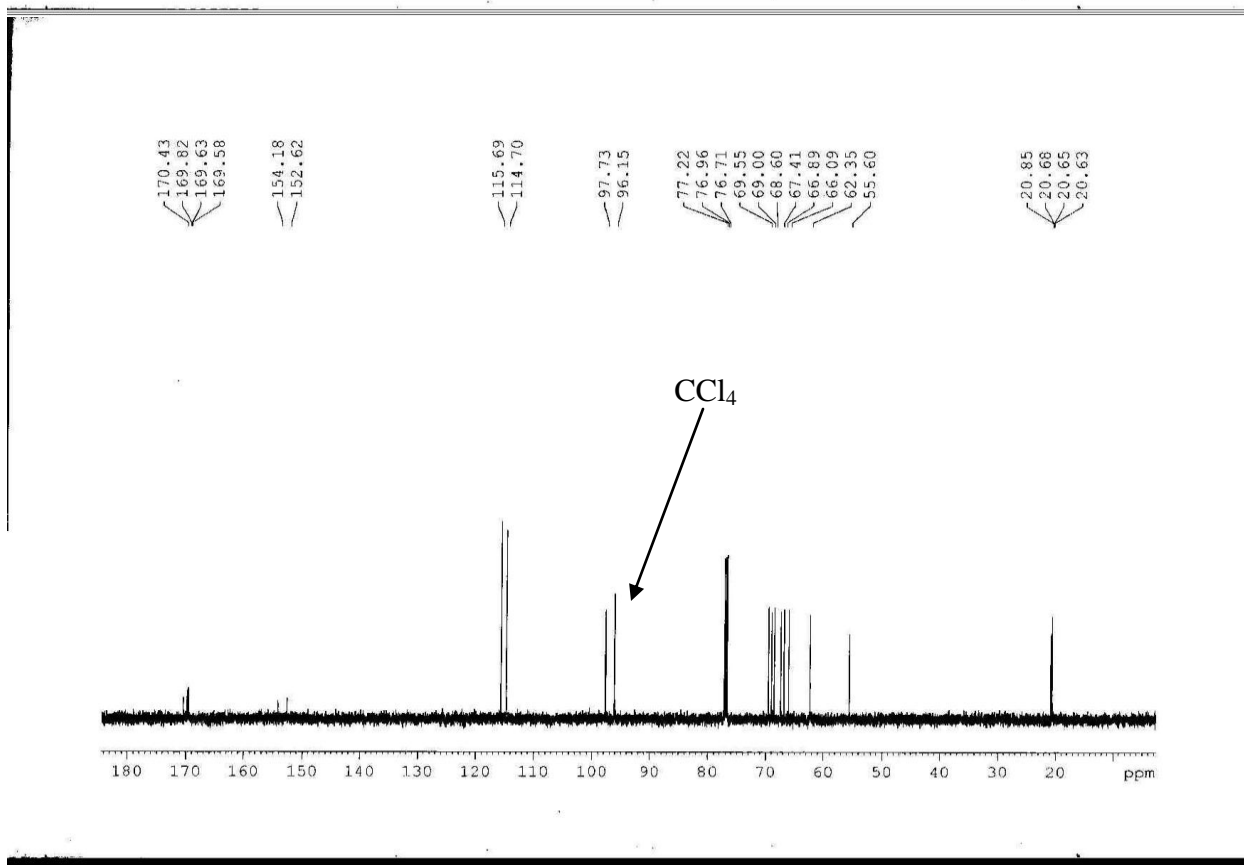

<sup>1</sup>H NMR (500 MHz) and <sup>13</sup>C NMR (125 MHz) spectra in CDCl<sub>3</sub>.



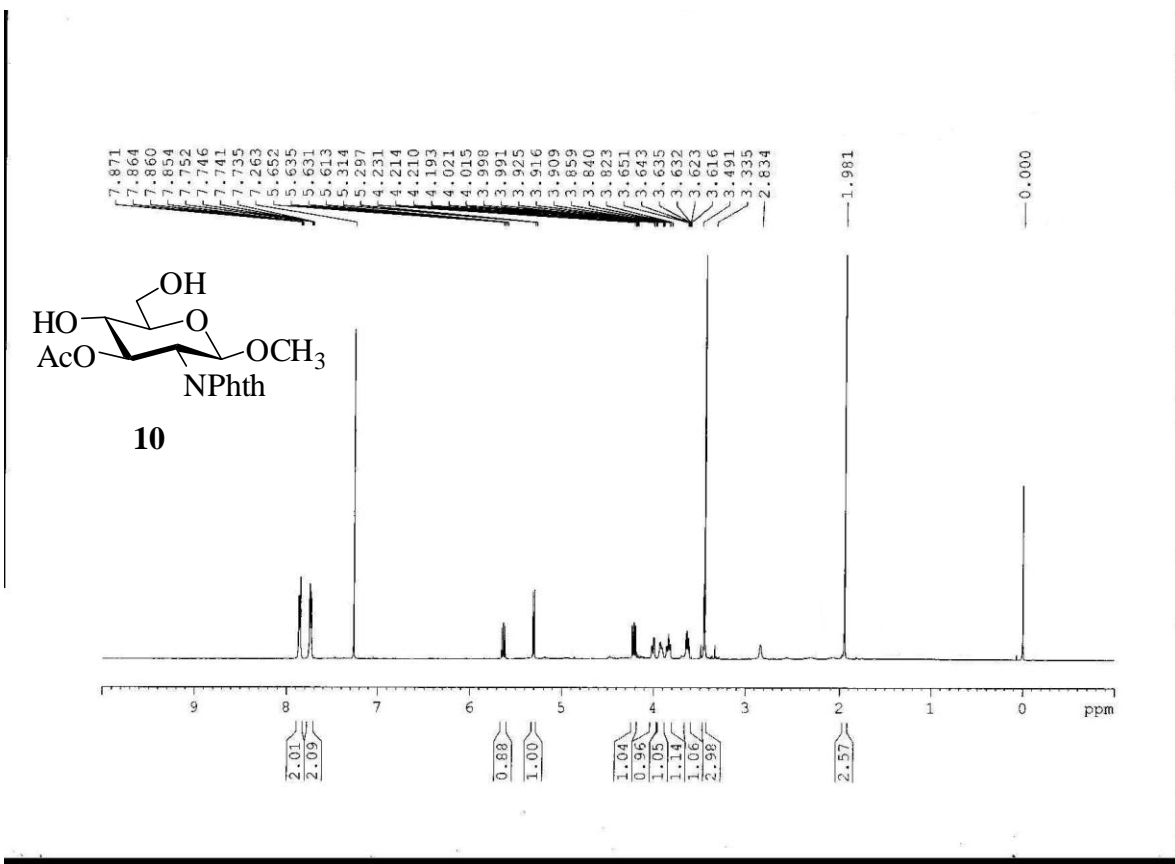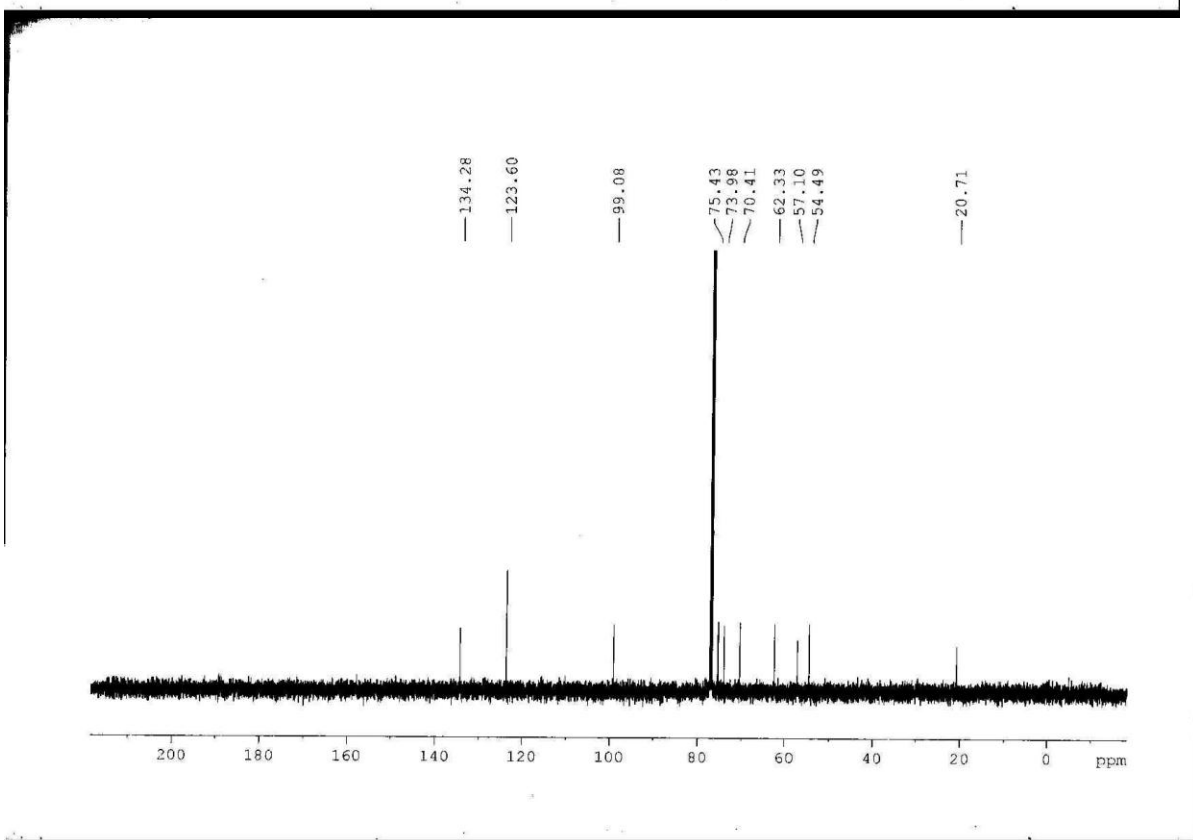

<sup>1</sup>H NMR (500 MHz) and <sup>13</sup>C NMR (125 MHz) spectra in CDCl<sub>3</sub>.

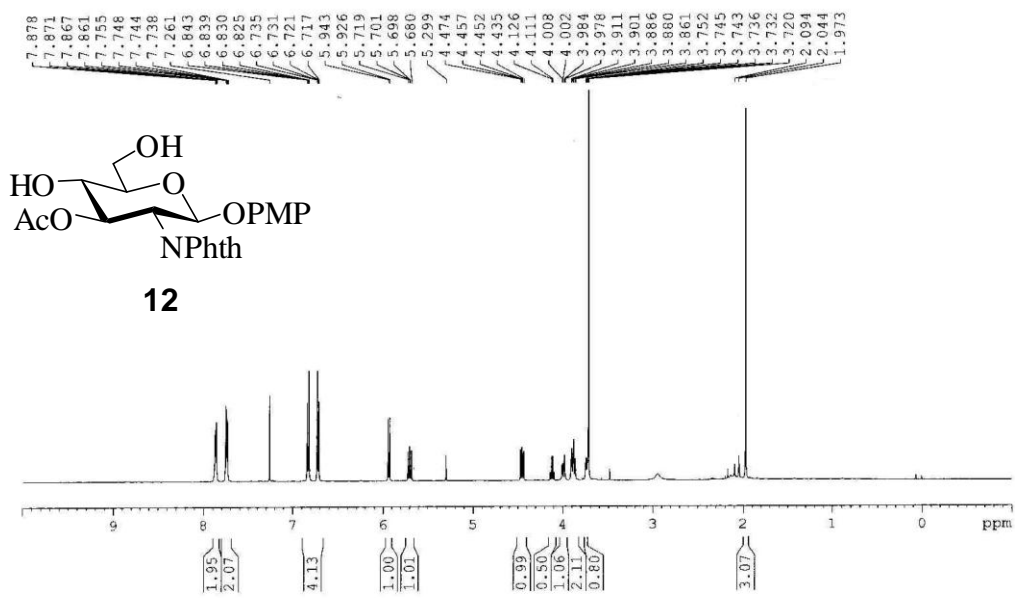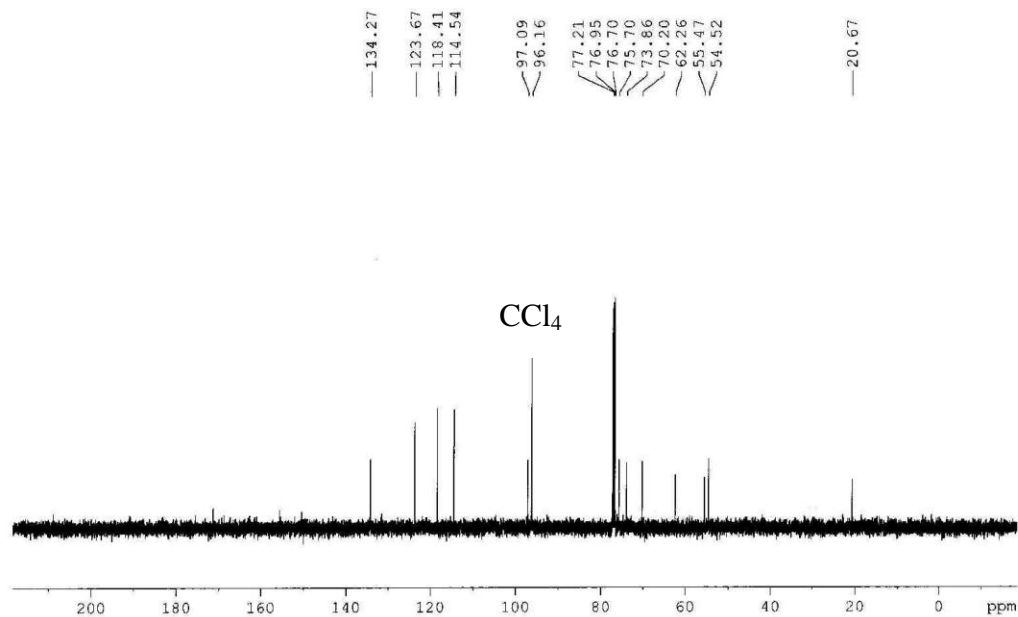

$^1\text{H}$  NMR (500 MHz) and  $^{13}\text{C}$  NMR (125 MHz) spectra in  $\text{CDCl}_3$ .

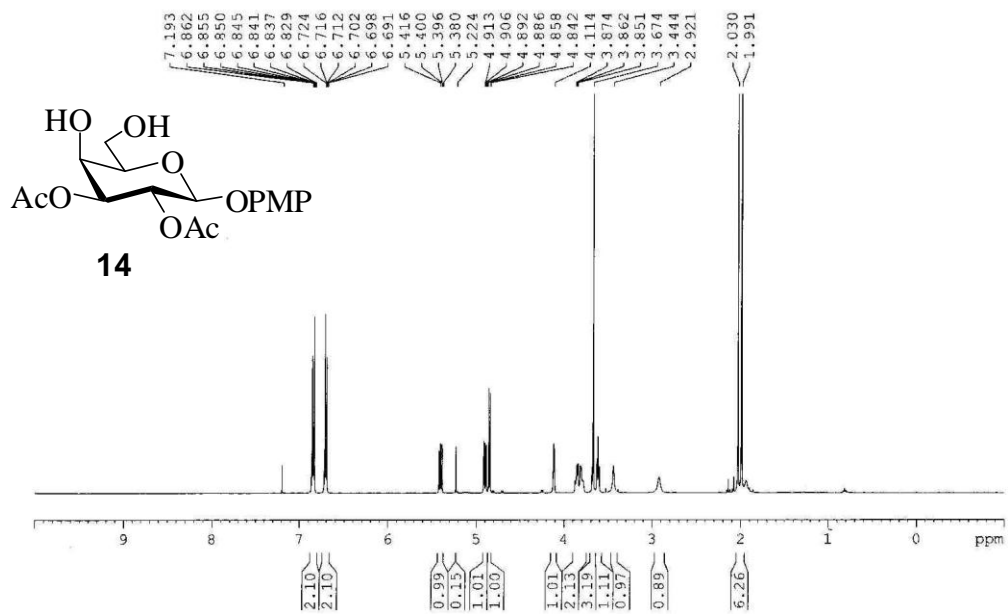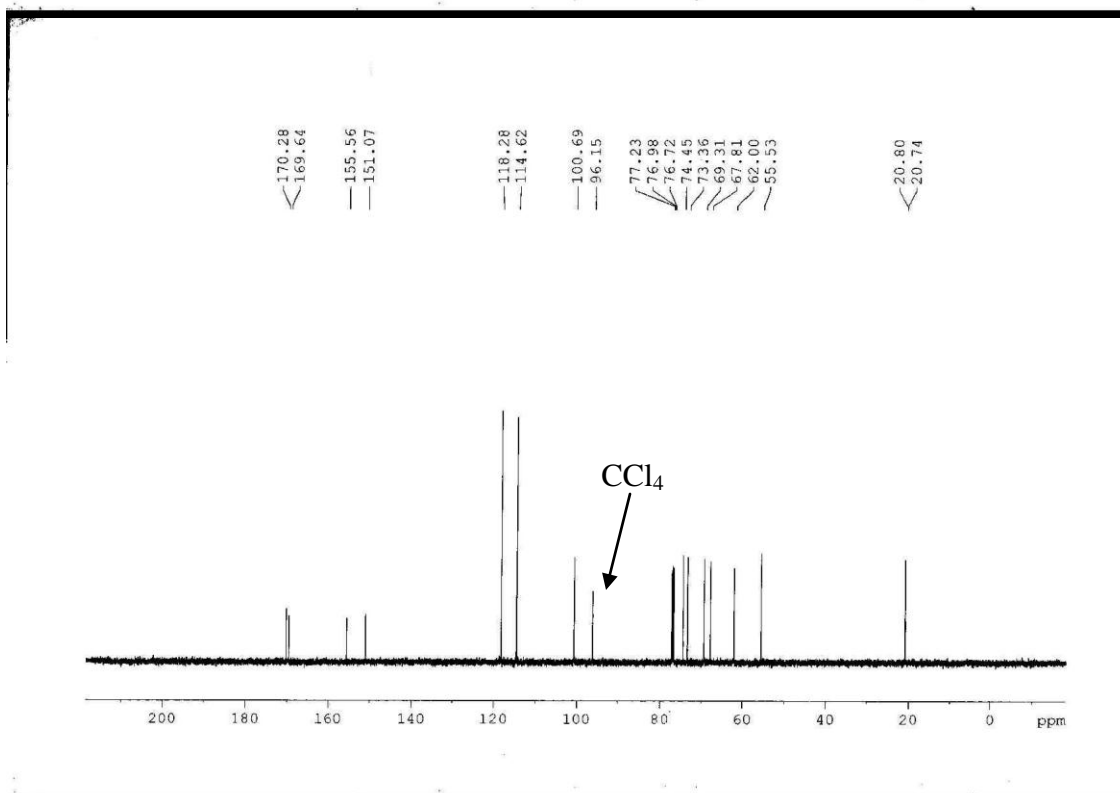

$^1\text{H}$  NMR (500 MHz) and  $^{13}\text{C}$  NMR (125 MHz) spectra in  $\text{CDCl}_3$ .

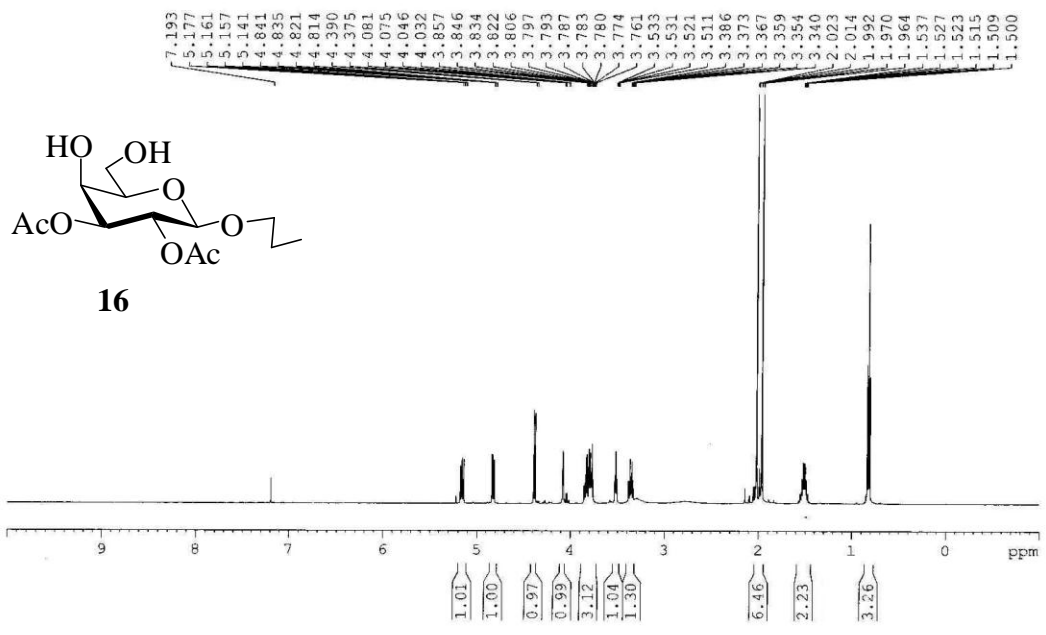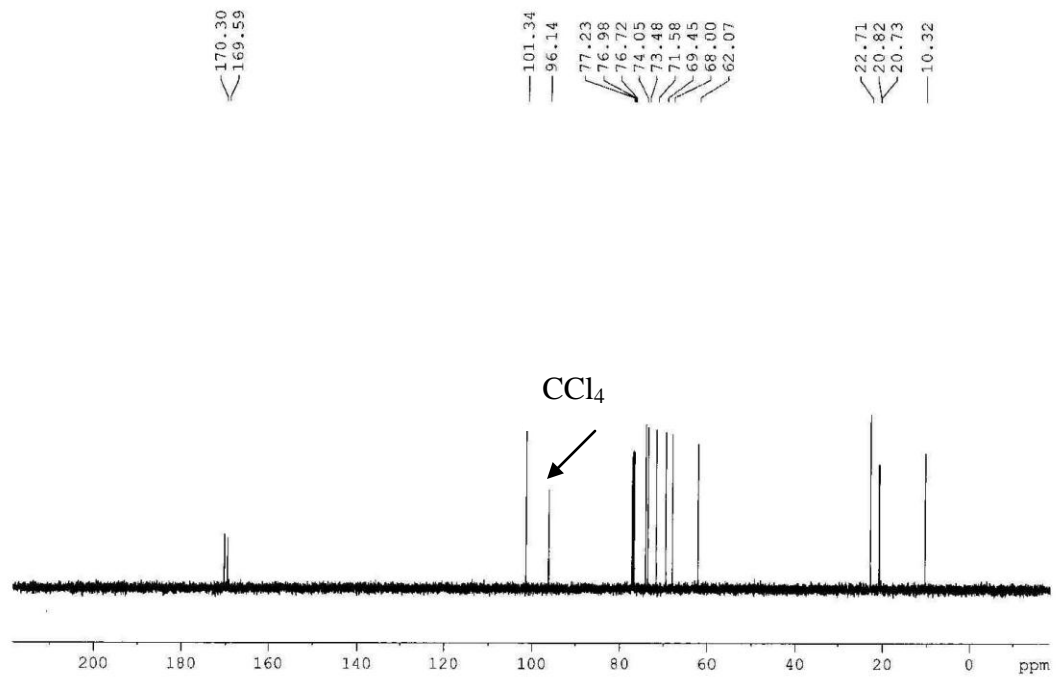

<sup>1</sup>H NMR (500 MHz) and <sup>13</sup>C NMR (125 MHz) spectra in CDCl<sub>3</sub>.

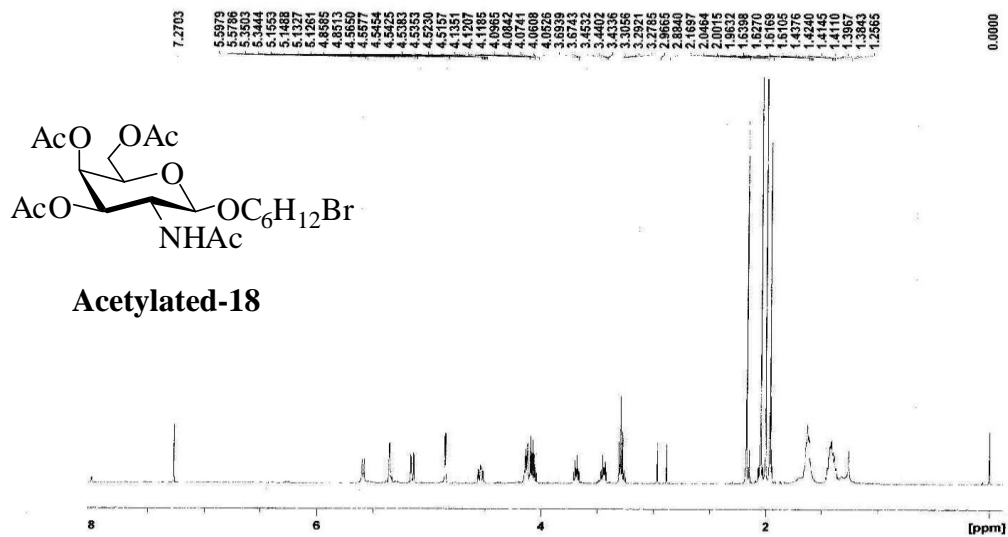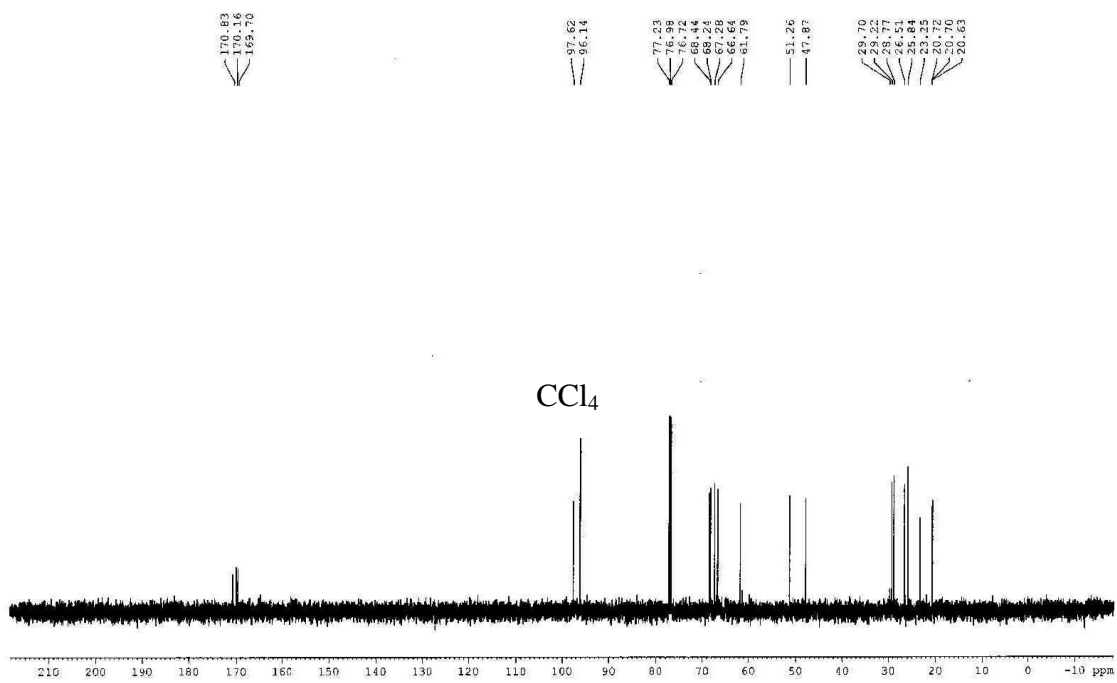

<sup>1</sup>H NMR (500 MHz) and <sup>13</sup>C NMR (125 MHz) spectra in CDCl<sub>3</sub>.

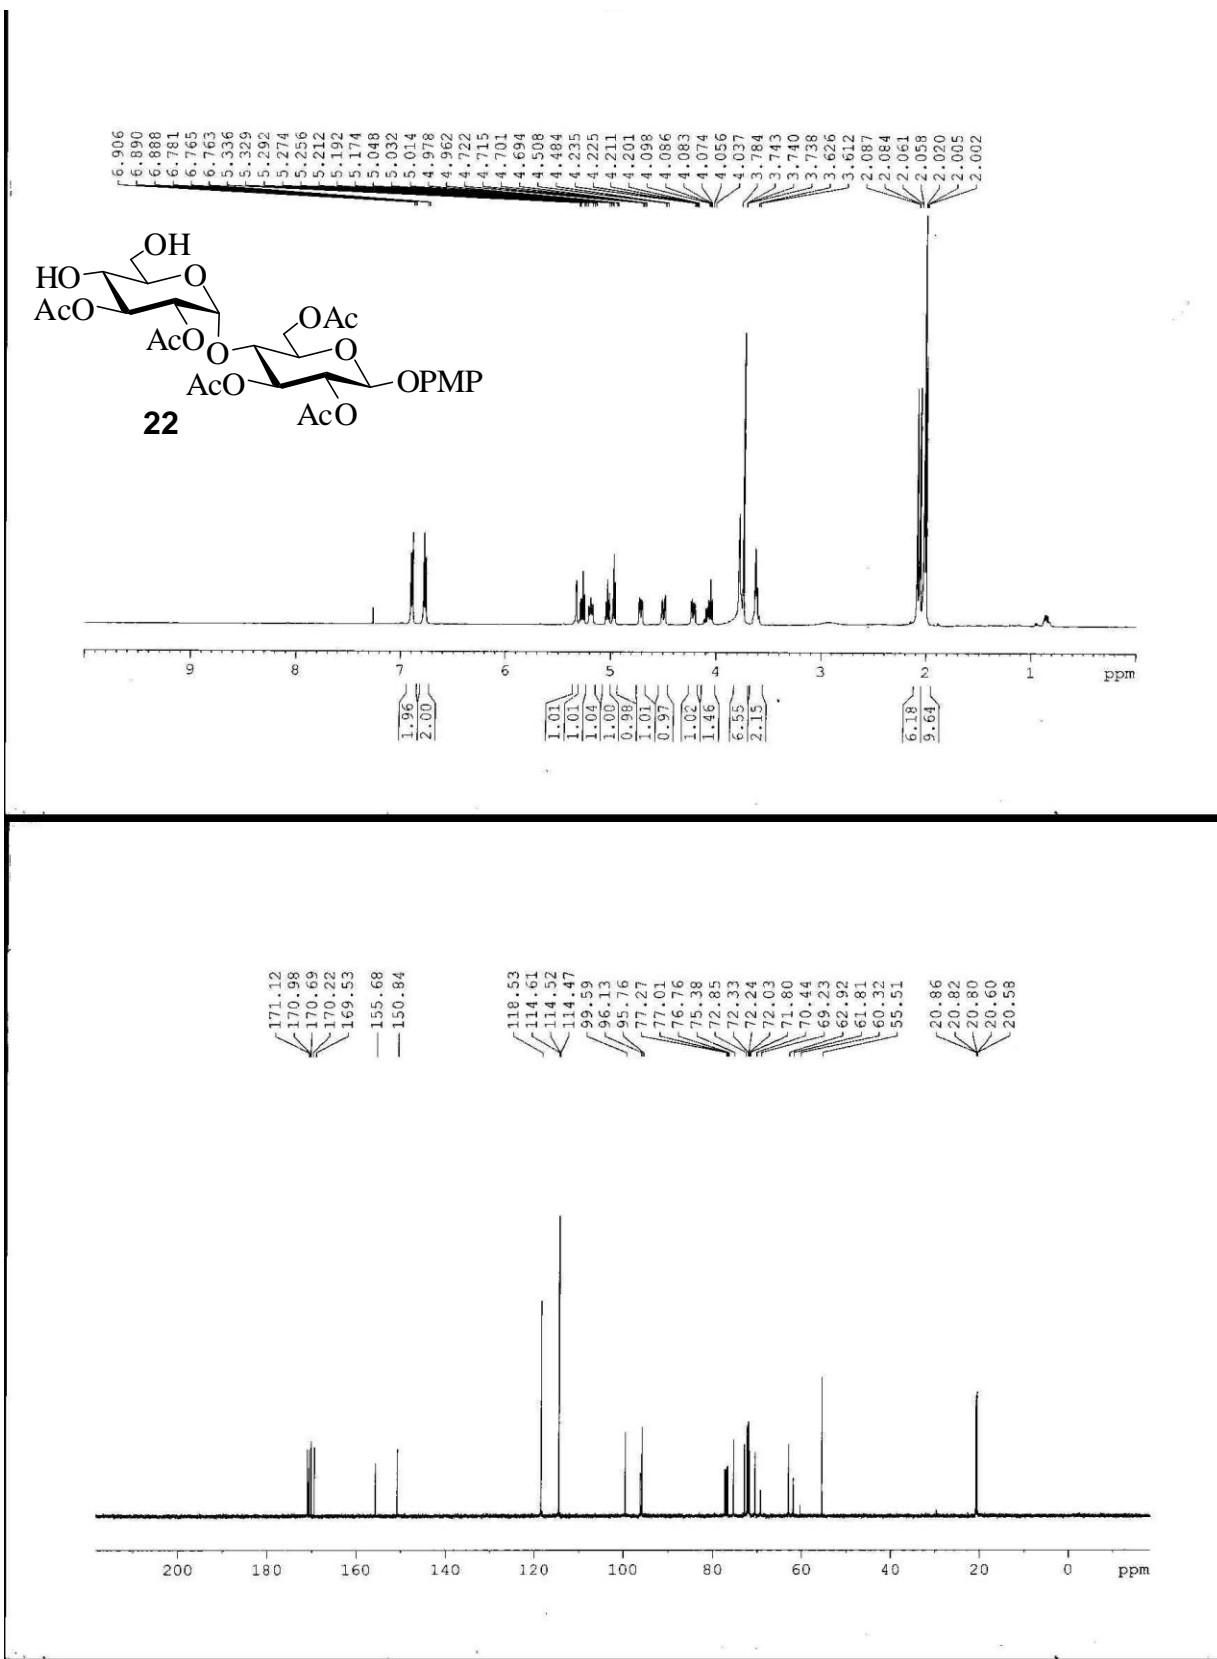

<sup>1</sup>H NMR (500 MHz) and <sup>13</sup>C NMR (125 MHz) spectra in CDCl<sub>3</sub>.

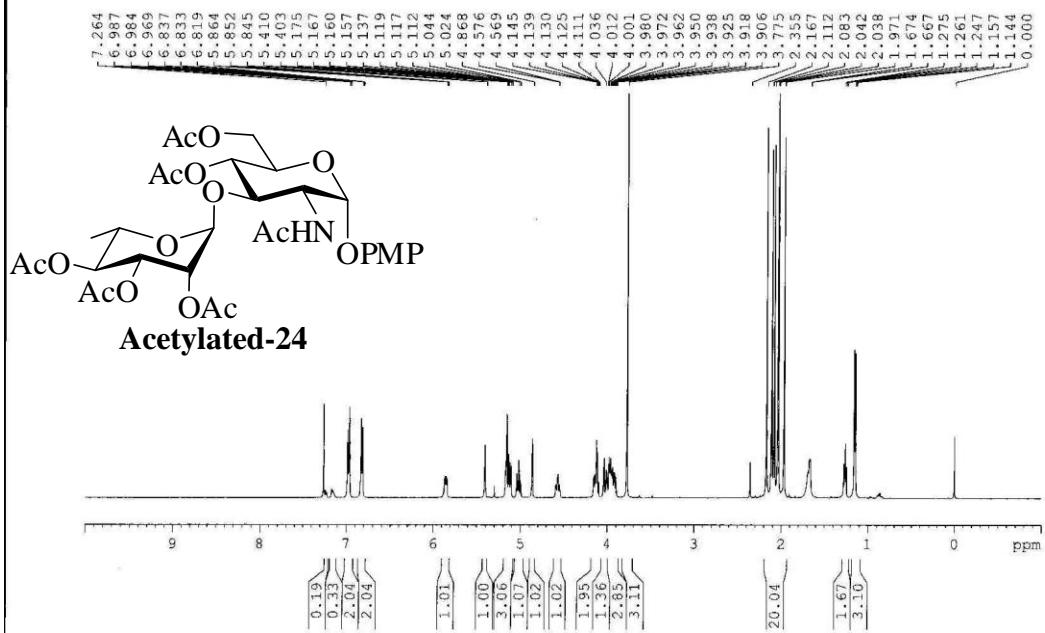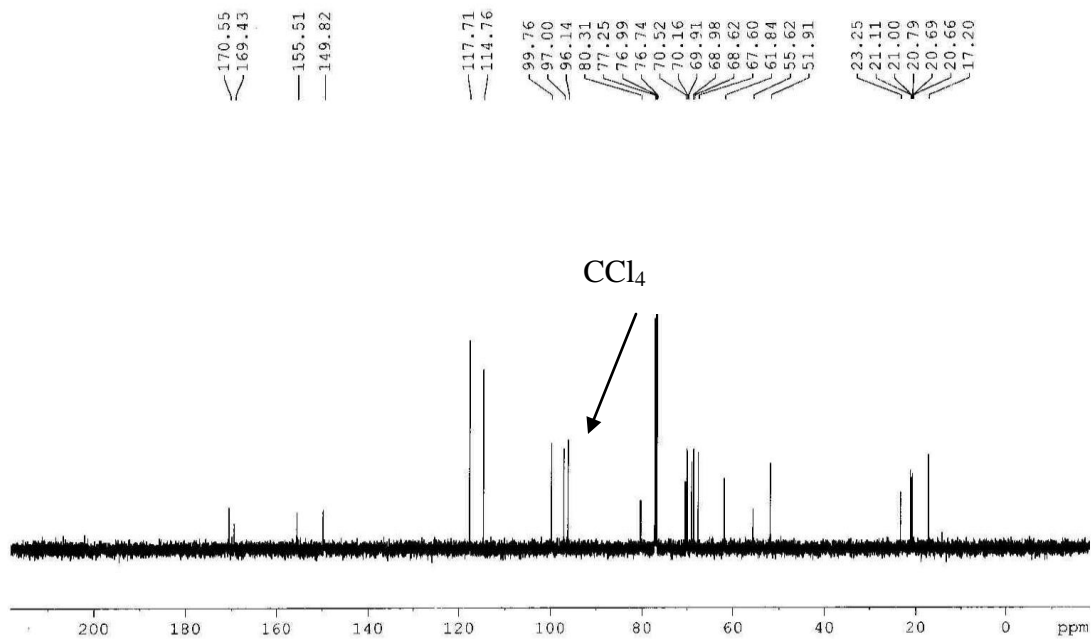

<sup>1</sup>H NMR (500 MHz) and <sup>13</sup>C NMR (125 MHz) spectra in CDCl<sub>3</sub>.

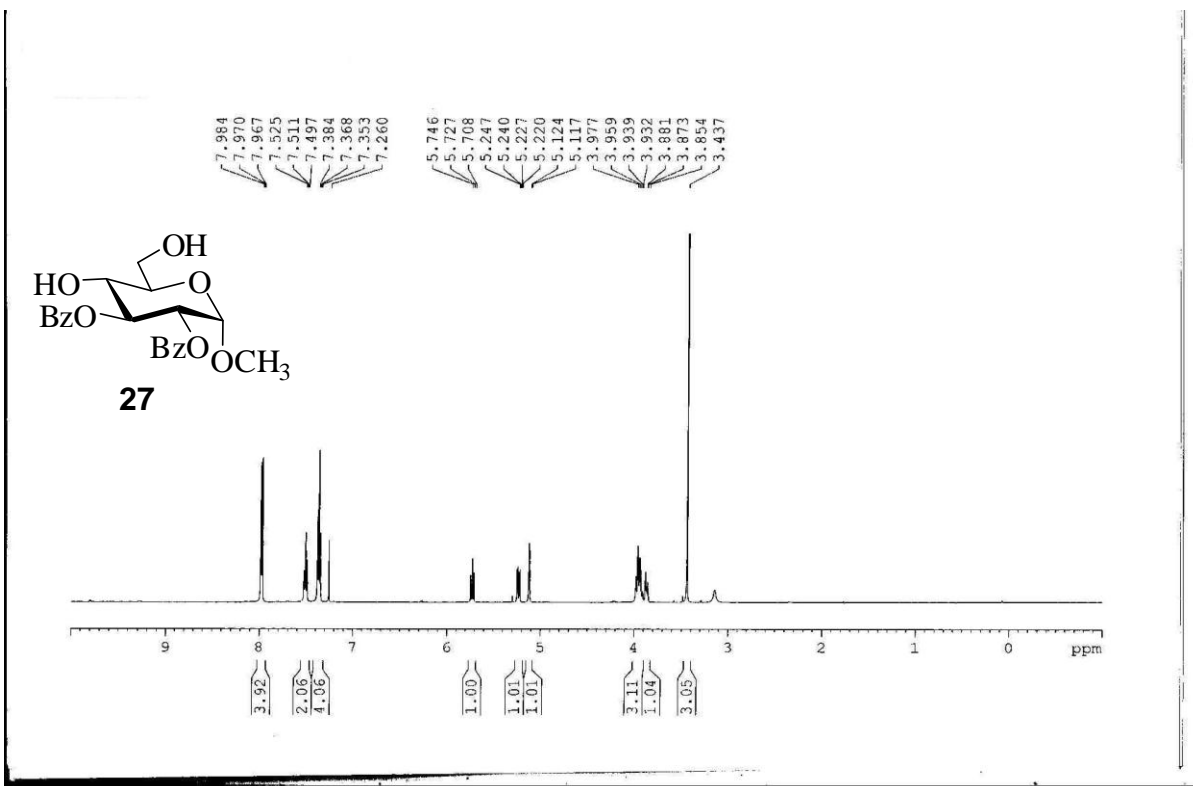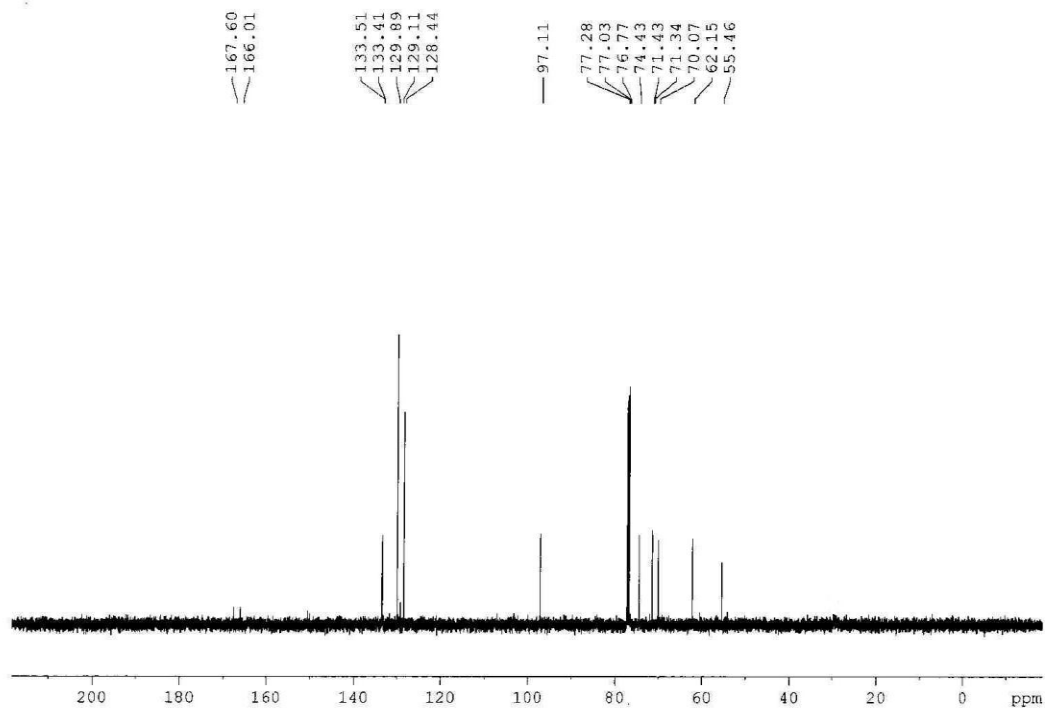

$^1\text{H}$  NMR (500 MHz) and  $^{13}\text{C}$  NMR (125 MHz) spectra in  $\text{CDCl}_3$ .



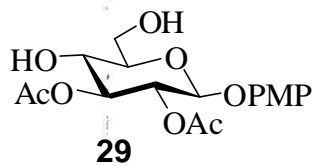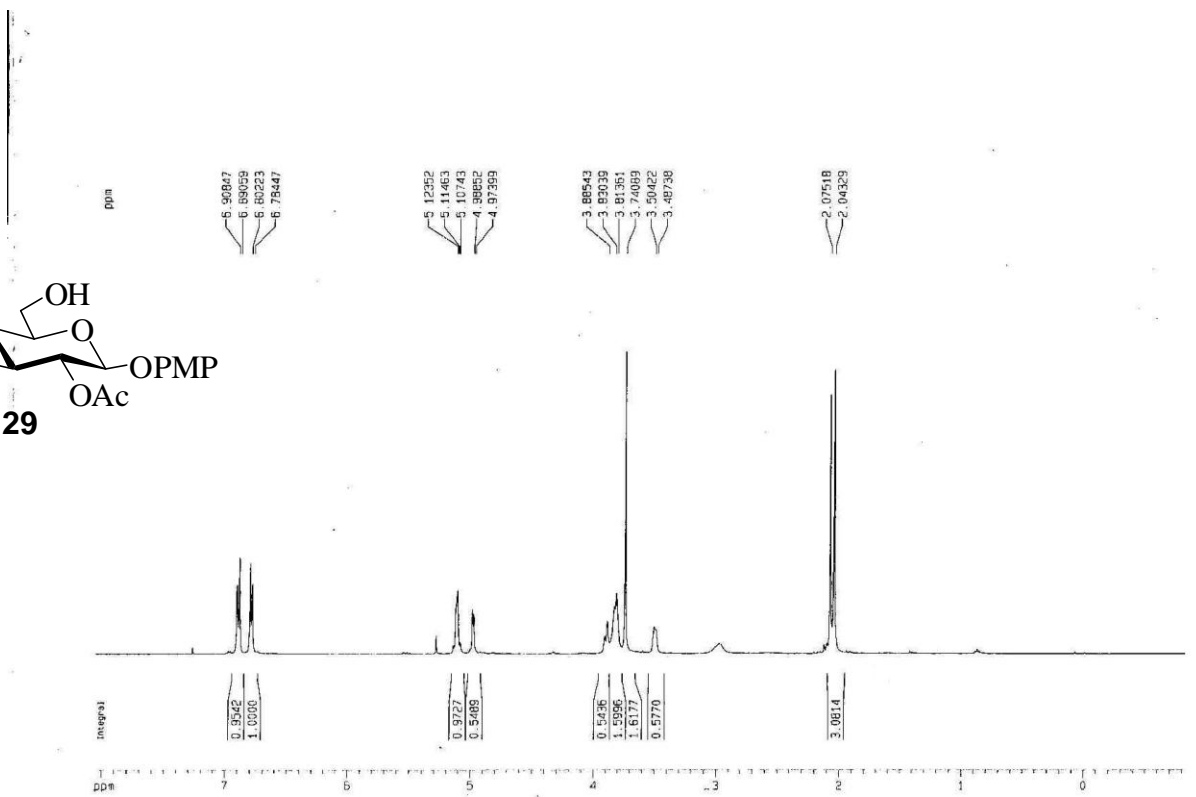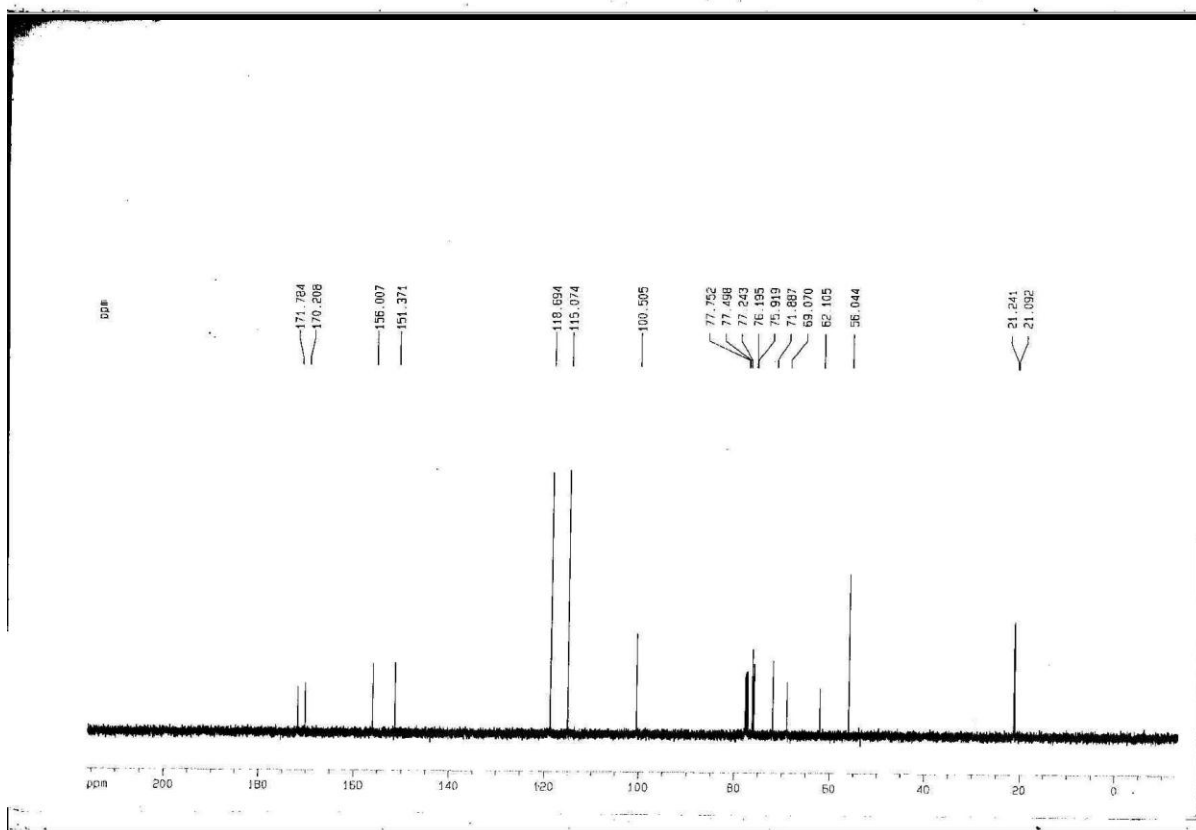

<sup>1</sup>H NMR (500 MHz) and <sup>13</sup>C NMR (125 MHz) spectra in CDCl<sub>3</sub>.
